# Supplementary material for: Gap junctions deliver malonyl-CoA from soma to germline to support embryogenesis in Caenorhabditis elegans
Source: eLife. 2020 Jul 31;9:e58619. doi: 10.7554/eLife.58619 (PMC7445009; doi:10.7554/eLife.58619)
Supplement: Figure 1—source data 2. [file elife-58619-fig1-data2.xlsx]

## Sheet: Sheet2
Figure 1-source data 2
N2 brood counts at 20 degrees				inx-8(rf) brood counts 20degrees			mIs11 at 22 deg	mIs11/sup-1 at 22 deg		fasn-1(ts);mIs11	fasn-1(ts);mIs11/inx-8(rf)			emb-8(ts); mIs11	emb-8;mIs11/inx-8(rf)	emb-8;inx-8(rf)
larvae	dead eggs	total		99			301	295		146	117	3		125	2	6
323	1	324		79			301	251		60	40	5		122	16	6
332	5	337		99			292	217		127	72	2		85	3	6
279	9	288		123			224	280		180	82	6		194	5	17
281	3	284		56			188	293		86	170	6		48	4	35
230	2	232		74			215	280		94	137	9		73	6	7
282	1	283		136			279	240		135	145	2		103	25	10
280	5	285		82			355	280		69	43	7		124	29	13
283	1	284		167			239	287		77	126	2		184	87	14
286	1	287		129			210	284		174	162	2		48	62	23
280	3	283		77			328	320		122	157	5		49	33	6
281	5	286		161			292	215		115.455	113.727	5		116	14	8
247	1	248		113			303	249		41.382	47.1553	4.5		83	134	8
297	4	301		75			285	289				2.31595		43	59	3
323	5	328		190			274	242						26	45	9
324	0	324		90			220	164						94.8667	34.9333	11.4
276	3	279		191			255	249						50.3018	37.4804	8.32209
307	2	309		81			270	254
319	1	320		68			234	183
302	2	304		89			294	236
364	0	364		136			303	209
297	5	302		123			237	287
351	0	351		104			297	279
277	1	278		0			300	253
241	0	241		26			254	230
267	2	269		84			244	238
279	0	279		114			214	316
276	0	276		30			221	246
274	0	274		77			285	260
290	0	290		100			228	249
276	3	276		150			255	280
282	1	283		137			317	207
299	0	299		121			266.062	255.062
307	0	307		102			40.2075	36.3424
291.273	2	293.182		95
28.5988	2.16506	28.6121		143
				66
				151
				116
				100
				62
				111
				52
				98
				152
				104
				160
				99
				60
				108
				114
				151
				60
				120
				57
				73
				113
				128
				127
				141
				51
				95
				119
				114
				141
				114
				127
				168
				177
				133
				109
				79
				105
				82
				67
				166
				129
				34
				164
				125
				88
				88
				186
				176
				124
				38
				79
				145
				132
				84
				107.589
				39.586
