# Supplementary material for: Gap junctions deliver malonyl-CoA from soma to germline to support embryogenesis in Caenorhabditis elegans
Source: eLife. 2020 Jul 31;9:e58619. doi: 10.7554/eLife.58619 (PMC7445009; doi:10.7554/eLife.58619)
Supplement: Figure 6—source data 1. [file elife-58619-fig6-data1.xlsx]

## Sheet: Sheet1
Figure 6 raw data
emb-8(ts); mIs11	emb-8(ts); mIs11; Ex+	emb-8(ts);mIs11/inx-8(rf)	emb-8(ts); mIs11/inx-8(rf); Ex+	emb-8(ts); inx-8(rf)	emb-8(ts); inx-8(rf); Ex+			fasn-1(ts);mIs11; Ex[pod-2(+)]	fasn-1(ts);mIs11/inx-8(rf);Ex[pod-2(+)		fasn-1(ts);mIs11	fasn-1(ts); mIs11/inx-8(rf)		fasn-1(ts);inx-8(rf)	fasn-1(ts); inx-8(rf); Ex[pod-2(+)]
0	87	2	53	0	0	63		8	92		184	208		13	2
4	22	3	130	0	15	61		105	151		216	272		14	2
74	78	3	47	10	5	127		114	185		111	251		35	5
18	97	3	66	1	6	114		74	149		188	193		19	4
92	200	4	29	12	9	60		178	106		245	213		19	3
0	21	13	14	1	8	139		145	155		215	323		2	6
26	113	6	20	4	12	106		127	123		239	211		1	7
15	140	4	108	2	4	83		97	125		228	238		26	1
19	131	1	35	2	4	100		155	137		235	195		16	2
5	37	15	66	0	2	83		105	106		138	253		50	23
35	113	51	55	6	10	93.6		83	118		193	181		16	3
12	36	0	87	1	2	28.167		69	134		198	218		14	10
25	178	2	14	1	15			155	76		213	267		30	9
4	178	3	7	1	2			127	111		218	236		49	8
18	111	0	0	2.92857	2			35	146		215	221		10	6.07143
19	102.8	1	58	3.81221	10			115	200			250		20.9333	5.64956
17	57.3974	10	122		3			98	137			0.0257127		14.7089
81		8	69		11			87	144
25.7778		7.16667	54.4444		6.66667			125	155		m/m-	m/s-		s/s-	s/s+
27.8136		11.7536	38.6907		4.71543			113	147
	-1.92402e-05							147	134.85			0.0257127			0.000696551
			1.93297e-05		0.0221353			168	29.4266
		0.0132064	0.00552457					85
								109.348
								40.8585	0.0256353
								m/m+	m/s+
									1.54174e-10
								2.19456e-08
