# Supplementary material for: Gap junctions deliver malonyl-CoA from soma to germline to support embryogenesis in Caenorhabditis elegans
Source: eLife. 2020 Jul 31;9:e58619. doi: 10.7554/eLife.58619 (PMC7445009; doi:10.7554/eLife.58619)
Supplement: Table 1—source data 1. [file elife-58619-table1-data1.xlsx]

## Sheet: Sheet3
Table 1 raw data
N2 brood counts at 20 degrees				inx-8(rf) brood counts 20degrees				i8i9(0);Ex(inx8gfp(DTC+,Sh-]				pod-2(0);Ex[pod-2(+)]] 20ng/ul				pod-2(0); Ex[pod-2(+)] 4ng/ul				fasn-1(0);Ex[fasn-1(+)]		fasn-1(0); inx-8(rf);; Ex[fasn-1(+)]
larvae	dead eggs	total		larvae				larvae	dead eggs	total		larvae	dead eggs	Totals		larvae	dead eggs	Totals		Pods/dead embryos		larvae	dead eggs	Totals
323	1	324		99				1	6	7		191	136	327		83	192	275		266		0	28	28
332	5	337		79				1	11	12		160	119	279		96	177	273		286		4	38	42
279	9	288		99				1	25	26		75	208	283		99	178	277		258		0	74	74
281	3	284		123				5	14	19		212	162	374		57	140	197		262		35	41	76
230	2	232		56				1	14	15		159	118	277		107	180	287		311		0	4	4
282	1	283		74				8	22	30		179	121	300		51	103	154		274		0	70	70
280	5	285		136				0	2	2		185	137	322		105	179	284		284		7	33	40
283	1	284		82				0	3	3		174	118	292		100	157	257		282		5	8	13
286	1	287		167				1	20	21		95	205	300		74	192	266		266		0	0	0
280	3	283		129				5	13	18		195	170	365		93	186	279		284		24	15	39
281	5	286		77				5	32	37		200	145	345		97	180	277		254		0	0	0
247	1	248		161				1	11	12		254	43	297		80	123	203		263		16	32	48
297	4	301		113				3	21	24		190	140	330		89	130	219		294		12	33	45
323	5	328		75				2	9	11		153	152	305		121	143	264		252		16	46	62
324	0	324		190				2	30	32		149	140	289		28	63	91		271		30	52	82
276	3	279		90				2	25	27		269	67	336		111	145	256		308		22	35	57
307	2	309		191				1	31	32		178	132	310		118	161	279		275.938		0	0	0
319	1	320		81				4	16	20		176	107	283		119	174	293		17.9164		8	99	107
302	2	304		68				0	32	32		184	147	331		70	165	235				11	21	32
364	0	364		89				0	20	20		220	116	336		128	137	265				16	55	71
297	5	302		136				5	62	67		197	95	292		110	184	294				34	51	85
351	0	351		123				4	42	46		107	56	163		92	164	256				0	0	0
277	1	278		104				0	8	8		156	97	253		100	134	234				25	69	94
241	0	241		0				1	10	11		182	97	279		89	225	314				28	36	64
267	2	269		26				0	14	14		37	124	161		65	122	187				25	55	80
279	0	279		84				1	27	28		166	124	290		86	129	215				0	39	39
276	0	276		114				0	8	8		174	89	263		109	153	262				13	31	44
274	0	274		30				1	19	20		124	95	219		104	138	242				22	25	47
290	0	290		77				0	7	7		155	48	203		95	140	235				6	8	14
276	3	276		100				0	11	11		82	92	174		109	151	260				15	37	52
282	1	283		150				0	5	5		105	46	151		95	150	245				9	64	73
299	0	299		137				1	28	29		163.968	117.613	281.581		58	164	222				38	62	100
307	0	307		121				1.75	18.6875	20.4375		50.2152	41.1085	59.1781		83	204	287				42	45	87
291.273	2	293.182		102				2.04782	12.6986	13.7347						140	100	240				9	59	68
28.5988	2.16506	28.6121		95												44	70	114				21	61	82
				143												66	180	246				22	41	63
				66												83	112	195				0	66	66
				151												98	195	293				29	66	95
				116												60	149	209				17	64	83
				100												81	239	320				26	74	100
				62												120	208	328				52	104	156
				111												90.561	156.488	247.049				38	51	89
				52												23.9166	37.3672	50.0385				41	97	138
				98																		40	60	100
				152																		0	0	0
				104																		48	50	98
				160																		7	15	22
				99																		17.2979	42.8511	60.1915
				60																		14.9607	26.9088	36.8255
				108
				114
				151
				60
				120
				57
				73
				113
				128
				127
				141	dead eggs	total
				51	1	52
				95	7	102
				119	12	131
				114	21	135
				141	9	150
				114	11	125
				127	22	149
				168	13	181
				177	11	188
				133	16	149
				109	7	116
				79	6	85
				105	9	114
				82	9	91
				67	10	77
				166	6	172
				129	9	138
				34	11	45
				164	5	169
				125	7	132
				88	7	95
				88	0	88
				186	19	205
				176	21	197
				124	6	130
				38	7	45
				79	26	105
				145	16	161
				132	18	150
				84	16	100
				107.589	11.2667	125.9
				39.586	6.34053	42.4659
